# Supplementary material for: cAMP Modulators before In Vitro Maturation Decrease DNA Damage and Boost Developmental Potential of Sheep Oocytes
Source: MDPI journal article supplement (doi:10.3390/ani11092512), 2021-08-26
Supplement: s1 [file s1]

## Supplementary material

**Table S1.** Details of primers used for qPCR.

| Gene         | Gene Function        | Primer Sequence (5'–3')                                | Product Size (bp) | Accession No.  |
|--------------|----------------------|--------------------------------------------------------|-------------------|----------------|
| <i>PPIA</i>  | Reference gene       | F- TCAACCCCAACCGTGTCTTC<br>R- GTCACCACCCTGGCACATAA     | 194               | NM_001308578.1 |
| <i>BMP15</i> | Oocyte maturation    | F-CTACGACTCCGCTTCGTGTGT<br>R-AGTGCCATGCCACCAGAAC       | 69                | NM_001031752.1 |
| <i>GDF9</i>  |                      | F-GAAGTGGGACAACCTGGATTGTG<br>R-CCCTGGGACAGTCCCCTTTA    | 71                | NM_174681.2    |
| <i>Cx43</i>  | GAP junctions        | F-TGCCTTTCGTTGTAACTCA<br>R-AGAACACATGAGCCAGGTACA       | 143               | NM_174068.2    |
| <i>NRF1</i>  |                      | F-CTGTCGCCCAAGTGAATTATTCG<br>R-TGTAACGTGGCCAGTTTTGT    | 67                | NM_001098002.2 |
| <i>POLG2</i> | Transcription factor | F-CTTCTGGGAACTACGGGAGAAC<br>R-GTAGCCTCTTGTTTACCAGATCCA | 84                | NM_001075191.1 |
| <i>TFAM</i>  |                      | F-CACTGGGAAAGTCAGGAGCG<br>R-ACATACGCAAACTAAAGGGGG      | 76                | XM_027962472.1 |

F, forward primer; R, reverse primer.

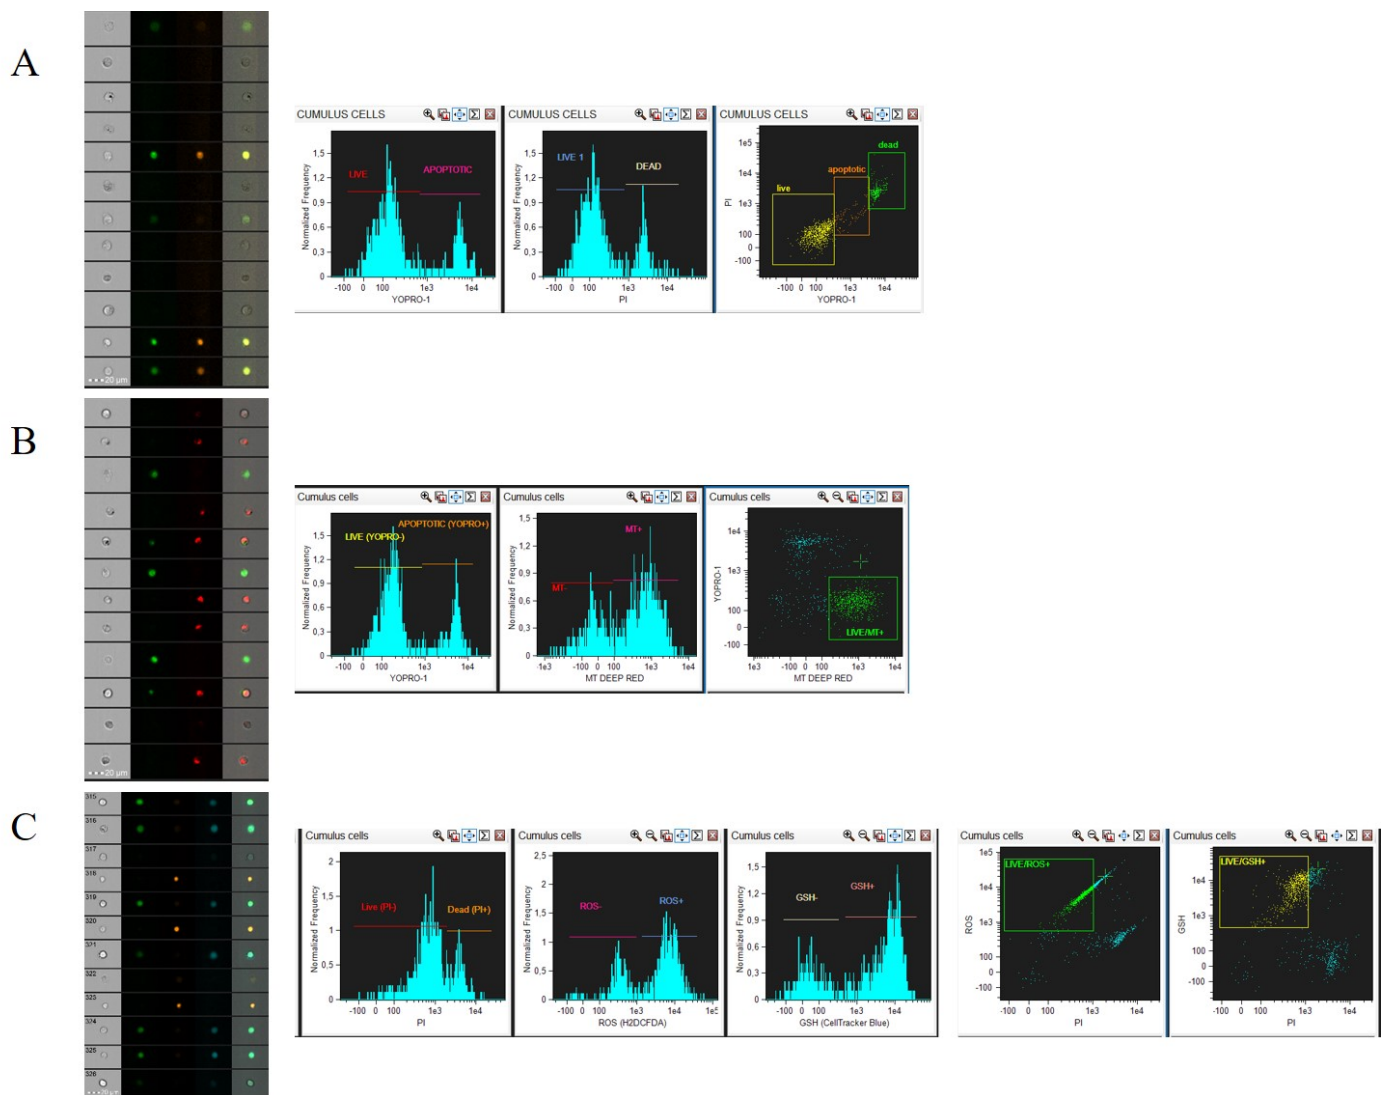

**Figure S1.** Representative images of cumulus cells populations regarding (A) viability, apoptosis and mortality, (B) active mitochondria, and (C) intracellular levels of ROS and GSH using flow cytometry.
